# Supplementary material for: Improved performances of a LiNi0.6Co0.15Mn0.25O2 cathode material with full concentration-gradient for lithium ion batteries
Source: Royal Society of Chemistry journal article supplement (doi:10.1039/c6ra23088a), 2016-01-01
Supplement: c6ra23088a1.pdf [file c6ra23088a1.pdf]

## Supplementary Information

# Improved performances of $\text{LiNi}_{0.6}\text{Co}_{0.15}\text{Mn}_{0.25}\text{O}_2$ cathode material with full concentration-gradient for lithium ion batteries

Zhonghui Sun <sup>ab</sup>, Dandan Wang <sup>ab</sup> Yingying Fan <sup>ab</sup>, Liansheng Jiao <sup>abd</sup>, Fenghua Li <sup>ab</sup>,  
Tongshun Wu <sup>ab</sup>, Dongxue Han <sup>ab</sup> and Li Niu <sup>abc\*</sup>

*a State Key Laboratory of Electroanalytical Chemistry, c/o Engineering Laboratory for Modern Analytical Techniques, CAS Center for Excellence in Nanoscience, Changchun, 130022, P. R. China*

*b University of Chinese Academy of Sciences, Beijing, 100049, P. R. China*

*c School of Chemistry & Chemical Engineering, Linyi University, Linyi 276005, P. R. China*

*d Department of Chemistry, Hebei Normal University for Nationalities, Chengde 067000, P. R. China.*

---

\* Corresponding author, email:[lniu@ciac.ac.cn](mailto:lniu@ciac.ac.cn) (L. Niu), Fax: +86-431-526 2800.

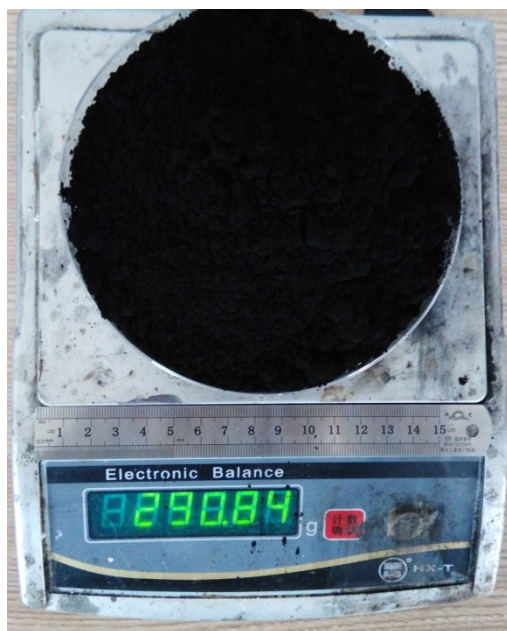

Fig. S1 Digital photograph of as-prepared full concentration gradient precursor  $\text{Ni}_{0.6}\text{Co}_{0.15}\text{Mn}_{0.25}(\text{OH})_2$ .

**Table S1** Total chemical composition of FCG and CC precursors by ICP analysis

|     | Measured molar ratio |       |       | Designed molar ratio |      |      |
|-----|----------------------|-------|-------|----------------------|------|------|
|     | Ni                   | Co    | Mn    | Ni                   | Co   | Mn   |
| FCG | 0.597                | 0.147 | 0.256 | 0.60                 | 0.15 | 0.25 |
| CC  | 0.598                | 0.149 | 0.253 | 0.60                 | 0.15 | 0.25 |

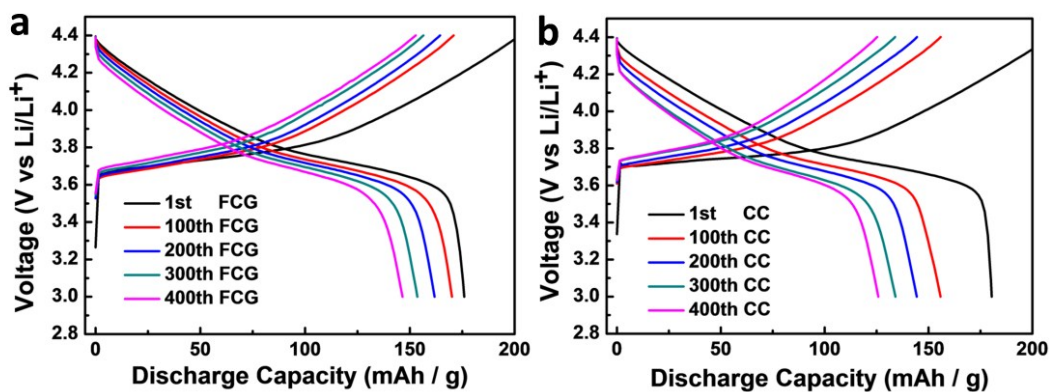

Fig. S2 1st, 100th, 200th, 300th, 400th charge-discharge curves of the FCG and CC

$\text{LiNi}_{0.6}\text{Co}_{0.15}\text{Mn}_{0.25}\text{O}_2$  electrodes at 0.5 C-rate between 3.0 and 4.4 V.

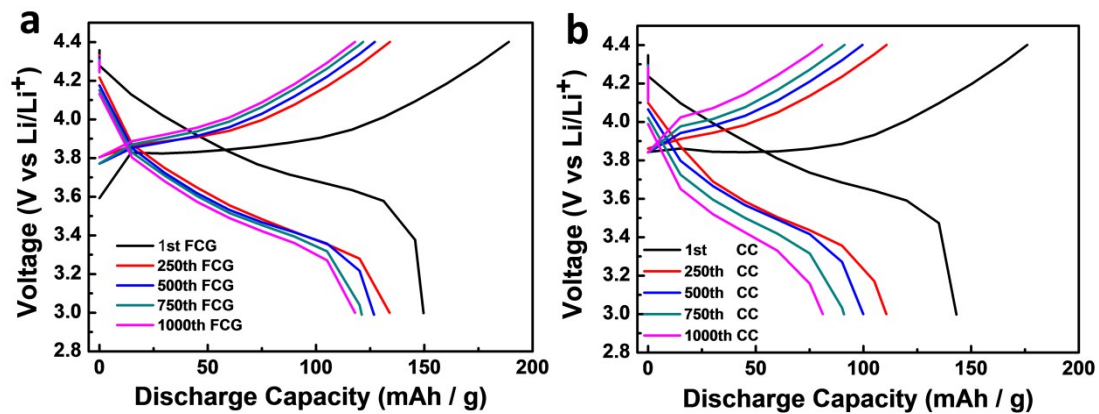

Fig. S3 1st, 250th, 500th, 750th, 1000th charge-discharge curves of the FCG and CC

$\text{LiNi}_{0.6}\text{Co}_{0.15}\text{Mn}_{0.25}\text{O}_2$  electrodes at 5 C-rate between 3.0 and 4.4 V.
